# Supplementary material
Source: Springer Nature journal article supplement (https://www.springermedizin.de/resource/supplementary/12943_2009_568_MOESM5_ESM.pdf/9554990)

## Preneoplastic MB lesions

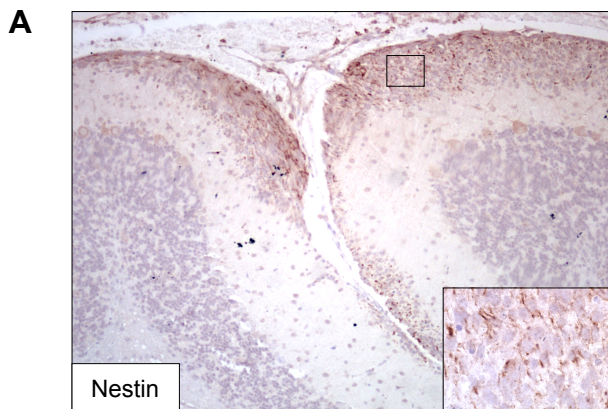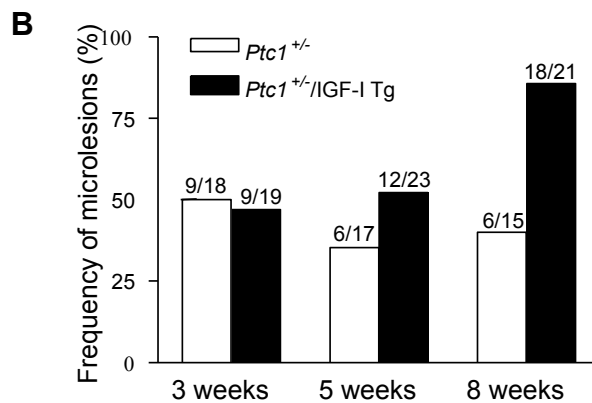

## Fully developed MB

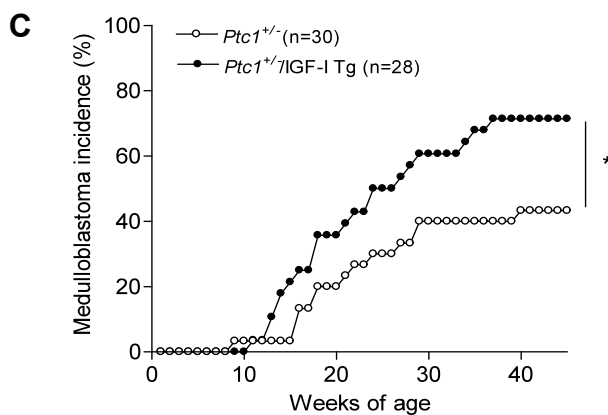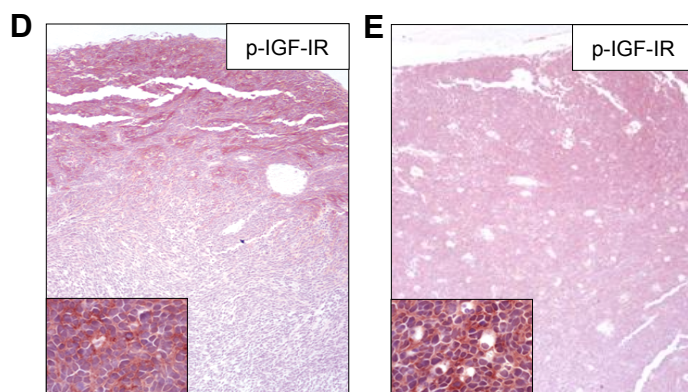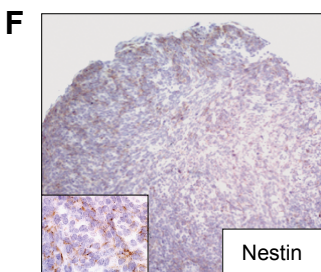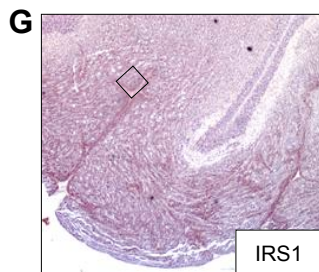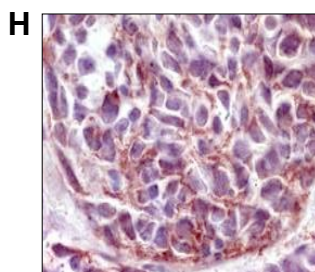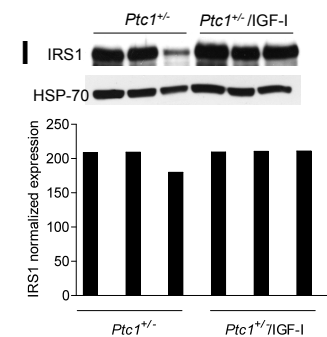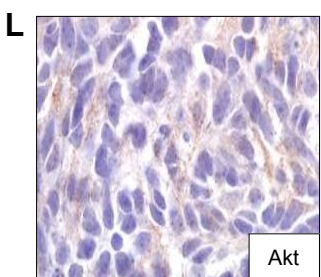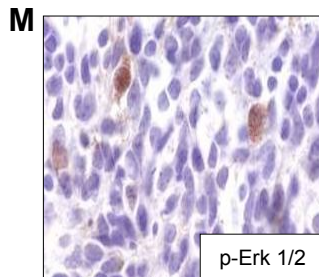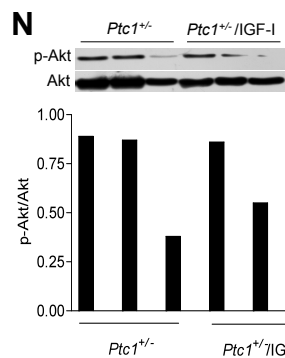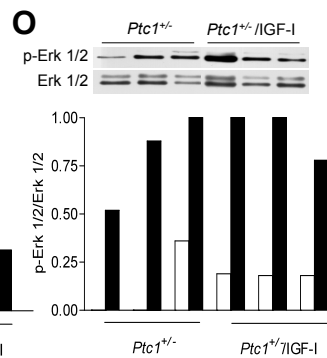

Supplement: MOESM5 [file 9554990]
